# Supplementary material for: Mechanisms Involved in the Promoting Activity of Fibroblasts in HTLV-1-Mediated Lymphomagenesis: Insights into the Plasticity of Lymphomatous Cells
Source: MDPI journal article supplement (doi:10.3390/ijms221910562), 2021-09-29
Supplement: s1 [file s1]

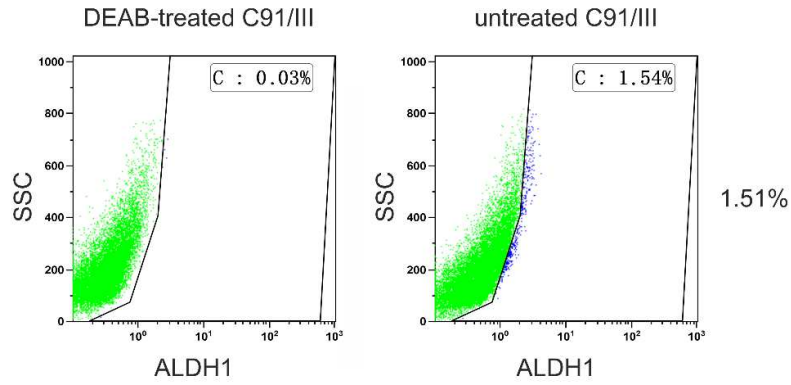

**Figure S1.** Aldehyde dehydrogenase 1 (ALDH1) activity in C91/III cells. Dot plots of C91/III cells incubated with or without N,N-diethylaminobenzaldehyde (DEAB) inhibitor and analyzed for ALDH1 activity. DEAB was used to provide a negative control for threshold set up. Flow cytometry representative images are shown as ALDH1 activity *vs* side scatter signal (SSC).

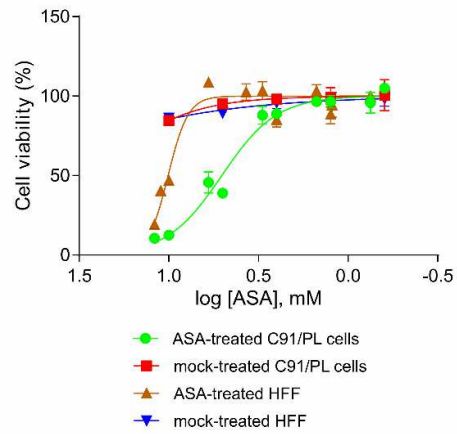

**Figure S2.** Dose–response curves of sensitivity of C91/PL cells and HFF to 3 mM acetylsalicylic acid (ASA) and to diluent (DMSO, mock-treated). The results are the mean and SD of three independent experiments performed in triplicate.

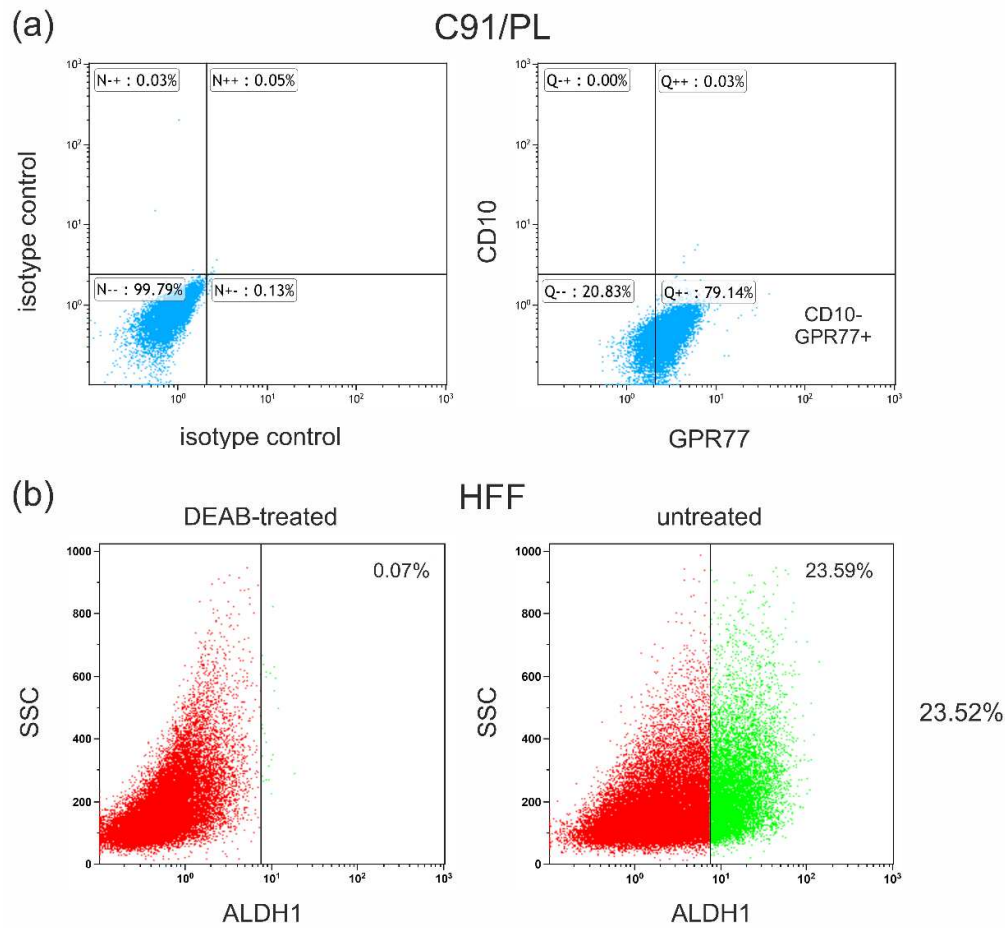

**Figure S3.** Characterization of C91/PL cells and HFF. (a) Flow cytometry analysis of CD10 and GPR77 expression in C91/PL cells. Cells were stained with anti-CD10 and anti-GPR77 monoclonal antibodies; isotype controls (left-hand side panel) were used to determine background staining. C91/PL cells do not express CD10 and the quadrant with CD10-GPR77<sup>+</sup> cells is indicated. Representative dot plot images are shown. (b) ALDH1 activity in HFF. Dot plots of HFF incubated with or without DEAB inhibitor and analyzed for ALDH1 activity. DEAB was used to provide a negative control for threshold set up. Flow cytometry representative images are shown as ALDH1 *vs* SSC.
